# Supplementary material for: Direct catalytic asymmetric synthesis of highly functionalized (2-ethynylphenyl)alcohols via Barbas–List aldol reaction: scope and synthetic applications
Source: Royal Society of Chemistry journal article supplement (doi:10.1039/c2ob25563d), 2012-01-01

## Supporting Information-I

# Direct Catalytic Asymmetric Synthesis of Highly Functionalized (2-Ethynylphenyl)alcohols via Barbos-List Aldol Reaction: Scope and Synthetic Applications

Dhevalapally B. Ramachary,\* Rumpa Mondal and  
R. Madhavachary

Catalysis Laboratory, School of Chemistry, University of Hyderabad, Central University  
(P.O.),

Hyderabad 500 046, India

[ramsc@uohyd.ernet.in](mailto:ramsc@uohyd.ernet.in)

**General Methods:** The  $^1\text{H}$  NMR and  $^{13}\text{C}$  NMR spectra were recorded at 400 MHz and 100 MHz, respectively. The chemical shifts are reported in ppm downfield to TMS ( $\delta = 0$ ) for  $^1\text{H}$  NMR and relative to the central  $\text{CDCl}_3$  resonance ( $\delta = 77.0$ ) for  $^{13}\text{C}$  NMR. *In the  $^{13}\text{C}$  NMR spectra, the nature of the carbons (C, CH,  $\text{CH}_2$  or  $\text{CH}_3$ ) was determined by recording the DEPT-135 experiment, and is given in parentheses.* The coupling constants  $J$  are given in Hz. Column chromatography was performed using Acme's silica gel (particle size 0.063-0.200 mm). High-resolution mass spectra were recorded on micromass ESI-TOF MS. GCMS mass spectrometry was performed on Shimadzu GCMS-QP2010 mass spectrometer. IR spectra were recorded on JASCO FT/IR-5300. Elemental analyses were recorded on a Thermo Finnigan Flash EA 1112 analyzer. Mass spectra were recorded on either VG7070H mass spectrometer using EI technique or Shimadzu-LCMS-2010 A mass spectrometer. The X-ray diffraction measurements were carried out at 298 K on an automated Enraf-Nonious MACH 3 diffractometer using graphite monochromated, Mo- $\text{K}\alpha$  ( $\lambda = 0.71073 \text{ \AA}$ ) radiation with CAD4 software or the X-ray intensity data were measured at 298 K on a Bruker SMART APEX CCD area detector system equipped with a graphite monochromator and a Mo- $\text{K}\alpha$  fine-focus sealed tube ( $\lambda = 0.71073 \text{ \AA}$ ). For thin-layer chromatography (TLC), silica gel plates Merck 60 F254

were used and compounds were visualized by irradiation with UV light and/or by treatment with a solution of *p*-anisaldehyde (23 mL), conc. H<sub>2</sub>SO<sub>4</sub> (35 mL), acetic acid (10 mL), and ethanol (900 mL) followed by heating.

The enantiomeric excess (*ee*) of the *BLA* products was determined by chiral stationary phase HPLC using a Daicel Chiralcel OD-H, Chiralcel OJ-H, Chiralpak AD-H, Chiralpak AS-H or Lux 5u Amylose-2 columns and hexane/2-propanol as the eluent. Retention times and solvent ratios are indicated in the respective entries.

**Materials:** All solvents and commercially available chemicals were used as received.

### General Experimental Procedures for the Asymmetric *BLA* Reactions:

**Prolinamide 3 catalyzed BLA reaction of 2-alkynylbenzaldehydes 1 with ketone 2 (Method A):** In a 10 mL round bottomed flask equipped with a magnetic stirring bar, to the prolinamide catalyst **3h** or **3i** (10 mol%) was added PhCO<sub>2</sub>H (10 mol%). The flask was cooled to –35 °C and then ketone **2** (1 mL, 0.3 M) was added to it. After stirring the reaction mixture at –35 °C for 0.5 h, 2-ethynylbenzaldehyde **1** (0.3 mmol) was added to it and stirring was continued at the same temperature for 24–60 h. The crude reaction mixture was worked up with aqueous NH<sub>4</sub>Cl solution and the aqueous layer was extracted with ethyl acetate (2 x 20 mL). The combined organic layers were dried (Na<sub>2</sub>SO<sub>4</sub>), filtered and concentrated. Pure *BLA* products **5** and double-aldol addition products **6** were obtained by column chromatography (silica gel, mixture of hexane/ethylacetate).

***trans*-4-*OH*-L-Proline catalyzed BLA reaction of 2-alkynylbenzaldehydes with ketones (Method B):** In an ordinary glass vial equipped with a magnetic stirring bar, to 0.3 mmol of 2-ethynylbenzaldehyde **1** was added 2.4 mL of solvent, followed by the addition of the catalyst *trans*-4-*OH*-L-proline **3d** (0.06 mmol, 20 mol%, 6.9 mg). After stirring the reaction mixture at 25 °C for 2–3 min, ketone **2** was added and the reaction mixture was allowed to stir at the same temperature for 24–72 h. The crude reaction mixture was worked up with aqueous NH<sub>4</sub>Cl solution and the aqueous layer was

extracted with ethyl acetate (2 x 20 mL). The combined organic layers were dried ( $\text{Na}_2\text{SO}_4$ ), filtered and concentrated. Pure BLA products **5** were obtained by column chromatography (silica gel, mixture of hexane/ethyl acetate).

***CuSO<sub>4</sub>/Na-(+)-Ascorbate-Catalyzed Click Reaction (Method C):*** Compound **5aa** (0.3 mmol) and aryl azide **7** (0.5 equiv.) was dissolved in *t*-BuOH/H<sub>2</sub>O (2 mL, 1:1 ratio) in a 10 mL round bottomed flask equipped with a magnetic stirring bar, to that 40 mol% of CuSO<sub>4</sub>, 20 mol% of Na-(+)-Ascorbate were added and the reaction mixture was stirred at the room temperature for 8-12 h. The crude reaction mixture was worked up with aqueous NH<sub>4</sub>Cl solution and the aqueous layer was extracted with ethyl acetate (2 x 20 mL). The combined organic layers were dried ( $\text{Na}_2\text{SO}_4$ ), filtered and concentrated. Pure click products **10** were obtained by column chromatography (silica gel, mixture of hexane/ethyl acetate).

***CuSO<sub>4</sub>/Cu-Catalyzed Click Reaction (Method D):*** Compound **6aa** (0.3 mmol) and aryl azide **7b** (0.6 mmol) was dissolved in EtOH (2 mL) in a 10 mL round bottomed flask equipped with a magnetic stirring bar, to that 1.0 equiv. of CuSO<sub>4</sub>, 5 mol% of Cu powder were added and the reaction mixture was stirred at the room temperature for 12 h. The crude reaction mixture was worked up with H<sub>2</sub>O and the aqueous layer was extracted with ethyl acetate (2 x 20 mL). The combined organic layers were dried ( $\text{Na}_2\text{SO}_4$ ), filtered and concentrated. Pure cyclic click product **9aab** was obtained by column chromatography (silica gel, mixture of hexane/ethyl acetate).

***General Procedure for the Reduction of BLA Products 5 (Method E):*** In a 10 mL round bottomed flask equipped with a magnetic stirring bar, compound **5aa-5bf** (0.2 mmol) was dissolved in dry MeOH (0.25 M) and then cooled to ice salt temperature, NaBH<sub>4</sub> (2 equiv.) was added to it under nitrogen atmosphere. After stirring the reaction mixture at same temperature for 0.5 h, the crude reaction mixture was worked up with aqueous NH<sub>4</sub>Cl solution and the aqueous layer was extracted with ethyl acetate (2 x 20 mL). The combined organic layers were dried ( $\text{Na}_2\text{SO}_4$ ), filtered and concentrated. Pure products **10** were obtained by column chromatography (silica gel, mixture of hexane/ethyl acetate).

**Lewis acid Mediated *syn*-Selective Reduction of BLA Products 5 (Method F):** In a 10 mL round bottomed flask equipped with a magnetic stirring bar, compound **5aa-5bf** (0.2 mmol) was dissolved in dry THF : MeOH (4:1, 0.2 M) and then cooled to  $-75\text{ }^{\circ}\text{C}$  temperature,  $\text{BEt}_2(\text{OMe})$  (1.1 equiv.), and  $\text{NaBH}_4$  (1.1 equiv.) was added to it under nitrogen atmosphere. After stirring the reaction mixture at same temperature for 4 h, the crude reaction mixture was worked up with aqueous  $\text{NH}_4\text{Cl}$  solution and the aqueous layer was extracted with ethyl acetate (2 x 20 mL). The combined organic layers were dried ( $\text{Na}_2\text{SO}_4$ ), filtered and concentrated. Pure products *syn*-**10** was obtained by column chromatography (silica gel, mixture of hexane/ethyl acetate).

**Double Protection of BLA-Reduction Product *syn*-10af (Method G):** In a 10 mL round bottomed flask compound *syn*-**10af** (189 mg, 0.3 mmol) was dissolved in 1 mL of dry DCM, to that 2.0 equiv. of 3,5-dinitrobenzoyl chloride and 2.0 equiv. of DMAP were added. After stirring the reaction mixture at  $25\text{ }^{\circ}\text{C}$  for 12 h, the crude reaction mixture was worked up with aqueous  $\text{NH}_4\text{Cl}$  solution and the aqueous layer was extracted with DCM (2 x 20 mL). The combined organic layers were dried ( $\text{Na}_2\text{SO}_4$ ), filtered and concentrated. Pure product **11af** was obtained by column chromatography (silica gel, mixture of hexane/ethyl acetate).

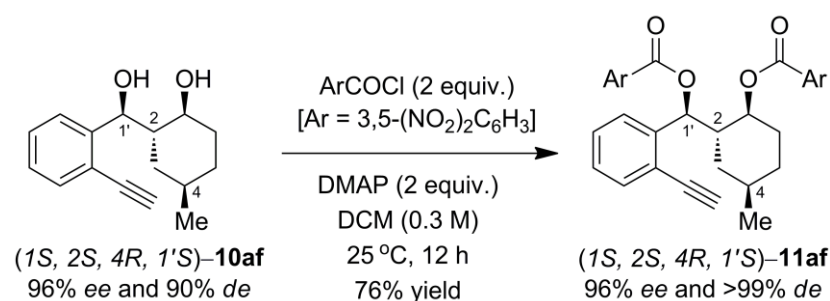

**Scheme S1:** Double protection on BLA-reduction product *syn*-**10af**.

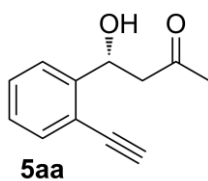

**(R)-4-(2-Ethynylphenyl)-4-hydroxy-butan-2-one (5aa):** Prepared following the Method-A; and purified by column chromatography using EtOAc/hexane and isolated as liquid. The enantiomeric excess (ee) was determined by chiral stationary phase HPLC using a Daicel Chiralcel OD-H column (hexane/2-propanol = 92:8, flow rate 1.0 mL/min,  $\lambda$  = 254 nm),  $t_R$  = 8.56 min (minor),  $t_R$  = 9.71 min (major).  $[\alpha]_D^{25} = +62.1^\circ$  ( $c$  = 0.27 g/100 mL, CHCl<sub>3</sub>, 93% ee); IR (Neat):  $\nu_{\max}$  3448, 3286 (O-H), 2925, 1709 (C=O), 1447, 1362, 1264, 1165, 1105, 1065, 763, 666, 651 and 625 cm<sup>-1</sup>; <sup>1</sup>H NMR (CDCl<sub>3</sub>)  $\delta$  7.58 (1H, d,  $J$  = 8.0 Hz), 7.46 (1H, dd,  $J$  = 7.6, 1.2 Hz), 7.37 (1H, dt,  $J$  = 7.6, 1.2 Hz), 7.22 (1H, dt,  $J$  = 7.6, 1.2 Hz)[Ar-H]; 5.57 (1H, dd,  $J$  = 9.6, 2.0 Hz, CHOH), 3.61 (1H, br s, OH), 3.34 (1H, s, C $\equiv$ CH), 3.00 (1H, dd,  $J$  = 17.2, 2.4 Hz, COCH<sub>2</sub>), 2.72 (1H, dd,  $J$  = 17.6, 9.6 Hz, COCH<sub>2</sub>), 2.19 (3H, s, COCH<sub>3</sub>); <sup>13</sup>C NMR (CDCl<sub>3</sub>, DEPT-135)  $\delta$  209.1 (C, C=O), 145.1 (C), 132.7 (CH), 129.3 (CH), 127.1 (CH), 125.2 (CH), 118.8 (C), 82.6 (CH, Ar-C $\equiv$ CH), 81.0 (C, Ar-C $\equiv$ CH), 67.6 (CH, CHOH), 50.8 (CH<sub>2</sub>, COCH<sub>2</sub>), 30.4 (CH<sub>3</sub>, COCH<sub>3</sub>); LRMS  $m/z$  189.10 (M+1), calcd. for C<sub>12</sub>H<sub>12</sub>O<sub>2</sub> 188.0837; Anal. calcd. for C<sub>12</sub>H<sub>12</sub>O<sub>2</sub> (188.0837); C, 76.57; H, 6.43. Found: C, 76.48; H, 6.51%.

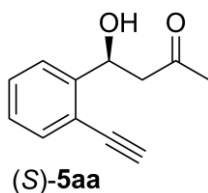

**(S)-4-(2-Ethynylphenyl)-4-hydroxy-butan-2-one (5aa):** Prepared following the Method-A; and purified by column chromatography using EtOAc/hexane and isolated as liquid. The enantiomeric excess (ee) was determined by chiral stationary phase HPLC using a Daicel Chiralcel OD-H column (hexane/2-propanol = 92:8, flow rate 1.0 mL/min,  $\lambda$  = 254 nm),  $t_R$  = 8.56 min (major),  $t_R$  = 9.71 min (minor).  $[\alpha]_D^{25} = -56.2^\circ$  ( $c$  = 0.42 g/100 mL, CHCl<sub>3</sub>, 95% ee); IR (Neat):  $\nu_{\max}$  3448, 3286 (O-H), 2925, 1709 (C=O), 1447, 1362, 1264, 1165, 1105, 1065, 763, 666, 651 and 625 cm<sup>-1</sup>.

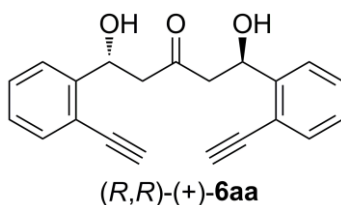

**(R,R)-1,5-Bis-(2-ethynylphenyl)-1,5-dihydroxy-pentan-3-one (6aa):** Prepared following Method-A, purified by column chromatography using EtOAc/hexane and isolated as gummy liquid. The enantiomeric excess (ee) was

determined by chiral stationary phase HPLC using a Daicel Chiralcel OD-H column (hexane/2-propanol = 92:8, flow rate 1.0 mL/min,  $\lambda$  = 254 nm),  $t_R$  = 20.10 min (minor),  $t_R$  = 22.95 min (major).  $[\alpha]_D^{25} = +122.0^\circ$  ( $c$  = 0.81 g/100 mL, CHCl<sub>3</sub>, >99% ee); IR (Neat):  $\nu_{\max}$  3285 (O-H), 1708 (C=O), 1479, 1363, 1316, 1204, 1105, 1059, 763, 685, 650 and 612 cm<sup>-1</sup>; <sup>1</sup>H NMR (CDCl<sub>3</sub>)  $\delta$  7.59 (2H, d,  $J$  = 8.0 Hz), 7.47 (2H, d,  $J$  = 7.2 Hz), 7.39 (2H, t,  $J$  = 7.6 Hz), 7.24 (2H, t,  $J$  = 7.6 Hz)[Ar-*H*]; 5.64 (2H, d,  $J$  = 9.2 Hz, 2 x *CHOH*), 3.42 (2H, br s, 2 x *OH*), 3.34 (2H, s, 2 x C $\equiv$ CH), 3.02 (2H, dd,  $J$  = 16.8, 2.0 Hz, 2 x COCH<sub>2</sub>), 2.82 (2H, dd,  $J$  = 17.2, 10.0 Hz, 2 x COCH<sub>2</sub>); <sup>13</sup>C NMR (CDCl<sub>3</sub>, DEPT-135)  $\delta$  211.0 (C, C=O), 145.0 (2 x C), 132.9 (2 x CH), 129.4 (2 x CH), 127.3 (2 x CH), 125.2 (2 x CH), 118.9 (2 x C), 82.9 (2 x CH, 2 x Ar-C $\equiv$ CH), 81.0 (2 x C, 2 x Ar-C $\equiv$ CH), 67.8 (2 x CH, 2 x *CHOH*), 50.6 (2 x CH<sub>2</sub>, 2 x COCH<sub>2</sub>); LRMS  $m/z$  317.00 ( $M^+$ -1), calcd. for C<sub>21</sub>H<sub>18</sub>O<sub>3</sub> 318.1256; Anal. calcd. for C<sub>21</sub>H<sub>18</sub>O<sub>3</sub> (318.1256); C, 79.22; H, 5.70. Found: C, 79.32; H, 5.65%.

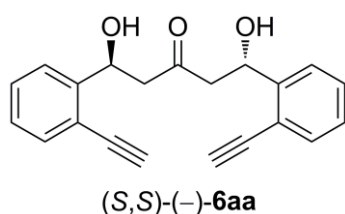

**(S,S)-1,5-Bis-(2-ethynylphenyl)-1,5-dihydroxy-pentan-3-one (6aa):** Prepared following Method-A, purified by column chromatography using EtOAc/hexane and isolated as gummy liquid. The enantiomeric excess (ee) was determined by chiral stationary phase HPLC using a

Daicel Chiralcel OD-H column (hexane/2-propanol = 92:8, flow rate 1.0 mL/min,  $\lambda$  = 254 nm),  $t_R$  = 20.10 min (major),  $t_R$  = 22.95 min (minor).  $[\alpha]_D^{25} = -112.4^\circ$  ( $c$  = 0.27 g/100 mL, CHCl<sub>3</sub>, >99% ee); IR (Neat):  $\nu_{\max}$  3285 (O-H), 1708 (C=O), 1479, 1363, 1316, 1204, 1105, 1059, 763, 685, 650 and 612 cm<sup>-1</sup>.

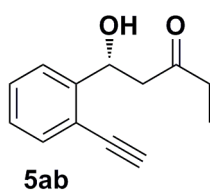

**(R)-1-(2-Ethynylphenyl)-1-hydroxy-pentan-3-one (5ab):** Prepared following the Method-A; purified by column chromatography using EtOAc/hexane and isolated as liquid. The enantiomeric excess (ee) was determined by chiral stationary phase HPLC using a Daicel

Chiralpak AD-H column (hexane/2-propanol = 94:6, flow rate 1.0 mL/min,  $\lambda$  = 254 nm),  $t_R$  = 9.22 min (major),  $t_R$  = 10.44 min (minor).  $[\alpha]_D^{25} = +109.7^\circ$  ( $c$  = 0.43 g/100 mL,

**CHCl<sub>3</sub>, 99% ee**; IR (Neat):  $\nu_{\max}$  3449, 3291 (O-H), 3069, 2978, 2939, 2102, 1712 (C=O), 1448, 1408, 1373, 1311, 1203, 1113, 1070 and 761 cm<sup>-1</sup>; <sup>1</sup>H NMR (CDCl<sub>3</sub>)  $\delta$  7.59 (1H, br dd,  $J$  = 8.0, 0.5 Hz), 7.47 (1H, dd,  $J$  = 7.6, 1.2 Hz), 7.39 (1H, dt,  $J$  = 7.6, 1.3 Hz), 7.23 (1H, dt,  $J$  = 7.5, 1.3 Hz)[Ar-H]; 5.58 (1H, d,  $J$  = 9.2 Hz, CHOH), 3.63 (1H, br s, OH), 3.33 (1H, s, Ar-C $\equiv$ CH), 3.00 (1H, dd,  $J$  = 17.4, 2.0 Hz, COCH<sub>2</sub>), 2.69 (1H, dd,  $J$  = 17.6, 10.0 Hz, COCH<sub>2</sub>), 2.56–2.40 (2H, m, COCH<sub>2</sub>CH<sub>3</sub>), 1.08 (3H, t,  $J$  = 7.3 Hz, COCH<sub>2</sub>CH<sub>3</sub>); <sup>13</sup>C NMR (CDCl<sub>3</sub>, DEPT-135)  $\delta$  212.2 (C, C=O), 145.2 (C), 132.8 (CH), 129.4 (CH), 127.1 (CH), 125.2 (CH), 118.8 (C), 82.6 (CH, Ar-C $\equiv$ CH), 81.1 (C, Ar-C $\equiv$ CH), 67.9 (CH, CHOH), 49.4 (CH<sub>2</sub>, COCH<sub>2</sub>), 36.6 (CH<sub>2</sub>, COCH<sub>2</sub>CH<sub>3</sub>), 7.5 (CH<sub>3</sub>, COCH<sub>2</sub>CH<sub>3</sub>); LRMS  $m/z$  203.00 (M+1), calcd. for C<sub>13</sub>H<sub>14</sub>O<sub>2</sub> 202.0994; Anal. calcd. for C<sub>13</sub>H<sub>14</sub>O<sub>2</sub> (202.0994); C, 77.20, H, 6.98; Found: C, 77.35; H, 6.87%.

**(3*S*,4*R*)-4-(2-Ethynylphenyl)-4-hydroxy-3-methyl-butan-2-one (5'ab):** Prepared

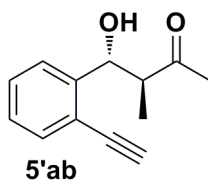

following Method-A, purified by column chromatography using EtOAc/hexane and isolated as liquid. The enantiomeric excess (ee) was determined by chiral stationary phase HPLC using a Daicel Chiralpak AD-H column (hexane/2-propanol = 94:6, flow rate 1.0

mL/min,  $\lambda$  = 254 nm),  $t_R$  = 10.91 min (major),  $t_R$  = 12.43 min (minor).  $[\alpha]_D^{25}$  = +30.9° ( $c$  = 0.13 g/100 mL, CHCl<sub>3</sub>, >99% ee and >99% de); IR (Neat):  $\nu_{\max}$  3430, 3295 (O-H), 3065, 2975, 2934, 2104, 1707 (C=O), 1481, 1456, 1360, 1242, 1170, 1100, 1051, 1019, 955, 912, 833 and 764 cm<sup>-1</sup>; <sup>1</sup>H NMR (CDCl<sub>3</sub>)  $\delta$  7.49 (1H, dd,  $J$  = 8.0, 1.2 Hz), 7.47–7.45 (1H, m), 7.39 (1H, dt,  $J$  = 8.0, 1.2 Hz), 7.25 (1H, dt,  $J$  = 7.6, 1.2 Hz)[Ar-H]; 5.29 (1H, dd,  $J$  = 7.2, 3.4 Hz, CHOH), 3.35 (1H, s, Ar-C $\equiv$ CH), 3.30 (1H, br s, OH), 3.09 (1H, quintet,  $J$  = 7.6 Hz, COCHCH<sub>3</sub>), 2.16 (3H, s, COCH<sub>3</sub>), 1.06 (3H, d,  $J$  = 7.2 Hz, COCHCH<sub>3</sub>); <sup>13</sup>C NMR (CDCl<sub>3</sub>, DEPT-135)  $\delta$  213.6 (C, C=O), 144.4 (C), 132.9 (CH), 129.3 (CH), 127.5 (CH), 126.2 (CH), 120.3 (C), 82.4 (CH, Ar-C $\equiv$ CH), 81.5 (C, Ar-C $\equiv$ CH), 73.7 (CH, CHOH), 53.0 (CH, COCHCH<sub>3</sub>), 30.0 (CH<sub>3</sub>, COCH<sub>3</sub>), 14.0 (CH<sub>3</sub>, COCHCH<sub>3</sub>); LRMS  $m/z$  203.05 (M+1), calcd. for C<sub>13</sub>H<sub>14</sub>O<sub>2</sub> 202.0994; Anal. calcd. for C<sub>13</sub>H<sub>14</sub>O<sub>2</sub> (202.0994); C, 77.20, H, 6.98; Found: C, 77.38; H, 7.05%.



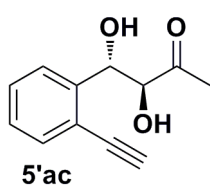

**(3*S*,4*R*)-4-(2-Ethynylphenyl)-3,4-dihydroxy-butan-2-one (5'ac):**

Prepared following Method-B, purified by column chromatography using EtOAc/hexane and isolated as liquid. The enantiomeric excess (ee) was determined by chiral stationary phase HPLC using a Daicel

Chiralpak AD-H column (hexane/2-propanol = 94:6, flow rate 1.0 mL/min,  $\lambda = 254$  nm),  $t_{\text{R}}(\text{syn}) = 18.46$  min (major),  $t_{\text{R}}(\text{syn}) = 23.66$  min (minor);  $t_{\text{R}}(\text{anti}) = 26.86$  min (major),  $t_{\text{R}}(\text{anti}) = 29.22$  min (minor).  $[\alpha]_{\text{D}}^{25} = +72.1^{\circ}$  ( $c = 0.47$  g/100 mL,  $\text{CHCl}_3$ , **93% ee** for major *anti*-isomer and **26% ee** for minor *syn*-isomer; and **50% de**); IR (Neat):  $\nu_{\text{max}}$  3418, 3283 (O-H), 3067, 2926, 2099, 1960, 1715 (C=O), 1622, 1399, 1360, 1254, 1096, 1053 and 762  $\text{cm}^{-1}$ ;  $^1\text{H}$  NMR ( $\text{CDCl}_3$ , **3:1 mixture of anti:syn diastereomers**)  $\delta$  7.59 (1H, d,  $J = 8.0$  Hz), 7.54–7.50 (3H, m), 7.44–7.38 (2H, m), 7.31–7.26 (2H, m)[Ar-*H*]; 5.60 (1H, s, ArCHOH), 5.42 (1H, d,  $J = 4.0$  Hz, ArCHOH), 4.75 (1H, d,  $J = 3.2$  Hz, COCHOH), 4.52 (1H, s, COCHOH), 3.89 (1H, br s, OH), 3.74 (1H, br s, OH), 3.45 (1H, s, Ar-C $\equiv$ CH), 3.42 (1H, s, Ar-C $\equiv$ CH), 3.16 (1H, br s, OH), 3.00 (1H, br s, OH), 2.37 (3H, s,  $\text{COCH}_3$ ), 1.88 (3H, s,  $\text{COCH}_3$ );  $^{13}\text{C}$  NMR ( $\text{CDCl}_3$ , **DEPT-135, 3:1 mixture of anti:syn diastereomers**)  $\delta$  208.1 (C, C=O), 207.4 (C, C=O), 142.8 (C), 141.3 (C), 133.2 (CH), 132.9 (CH), 129.3 (2 x CH), 127.9 (CH), 127.6 (CH), 126.3 (CH), 126.0 (CH), 119.9 (C), 119.0 (C), 83.3 (CH, Ar-C $\equiv$ CH), 83.2 (CH, Ar-C $\equiv$ CH), 81.5 (C, Ar-C $\equiv$ CH), 81.1 (C, Ar-C $\equiv$ CH), 79.7 (CH, ArCHOH), 79.4 (CH, ArCHOH), 73.2 (CH, COCHOH), 71.1 (CH, COCHOH), 27.9 ( $\text{CH}_3$ ,  $\text{COCH}_3$ ), 25.3 ( $\text{CH}_3$ ,  $\text{COCH}_3$ ); LRMS  $m/z$  205.20 ( $\text{M}+1$ ), calcd. for  $\text{C}_{12}\text{H}_{12}\text{O}_3$  204.0786; Anal. calcd. for  $\text{C}_{12}\text{H}_{12}\text{O}_3$  (204.0786); C, 70.57, H, 5.92; Found: C, 70.42; H, 5.85%.

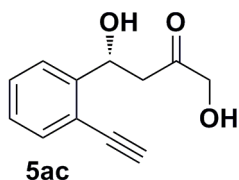

**(*R*)-4-(2-Ethynylphenyl)-1,4-dihydroxy-butan-2-one (5ac):**

Prepared following Method-A, purified by column chromatography using EtOAc/hexane and isolated as liquid. The enantiomeric excess (ee) was determined by chiral stationary phase HPLC using

a Daicel Chiralpak AD-H column (hexane/2-propanol = 90:10, flow rate 1.0 mL/min,  $\lambda = 254$  nm),  $t_{\text{R}} = 16.11$  min (major),  $t_{\text{R}} = 19.56$  min (minor).  $[\alpha]_{\text{D}}^{25} = +35.2^{\circ}$  ( $c = 0.18$  g/100 mL,  $\text{CHCl}_3$ , **90% ee**); IR (Neat):  $\nu_{\text{max}}$  3397 (O-H), 3283, 3073, 2926, 2859, 1715



(C=O), 1622, 1449, 1389, 1263, 1161, 1069 and 762  $\text{cm}^{-1}$ ;  $^1\text{H}$  NMR ( $\text{CDCl}_3$ )  $\delta$  7.56 (1H, d,  $J = 7.6$  Hz), 7.47 (1H, d,  $J = 7.6$  Hz), 7.40 (1H, t,  $J = 7.6$  Hz), 7.24 (1H, t,  $J = 7.6$  Hz) [Ar-*H*]; 5.62 (1H, dd,  $J = 9.6, 2.4$  Hz), 4.28 (2H, ABq,  $J = 19.2$  Hz), 3.38 (1H, s, Ar-C $\equiv$ CH), 3.40–3.20 (2H, br s, 2 x OH), 2.90 (1H, dd,  $J = 16.4, 2.8$  Hz), 2.76 (1H, dd,  $J = 16.4, 9.6$  Hz);  $^{13}\text{C}$  NMR ( $\text{CDCl}_3$ , DEPT-135)  $\delta$  209.3 (C, C=O), 144.9 (C), 133.0 (CH), 129.5 (CH), 127.5 (CH), 125.1 (CH), 118.9 (C), 83.1 (CH, Ar-C $\equiv$ CH), 80.9 (C, Ar-C $\equiv$ CH), 68.8 ( $\text{CH}_2$ ,  $\text{COCH}_2\text{OH}$ ), 67.9 (CH, ArCHOH), 46.2 ( $\text{CH}_2$ ,  $\text{COCH}_2$ ); LRMS  $m/z$  205.20 ( $\text{M}+1$ ), calcd. for  $\text{C}_{12}\text{H}_{12}\text{O}_3$  204.0786; Anal. calcd. for  $\text{C}_{12}\text{H}_{12}\text{O}_3$  (204.0786); C, 70.57, H, 5.92; Found: C, 70.45; H, 5.86%.

**(2*S*,1'*R*)-2-[(2-Ethynylphenyl)-hydroxymethyl]-cyclohexanone (*anti*-5ad):** Prepared

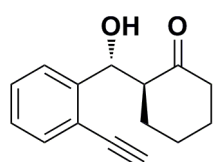

*anti*-5ad

following Method-A, purified by column chromatography using EtOAc/hexane and isolated as liquid. The enantiomeric excess (ee) was determined by chiral stationary phase HPLC using a Daicel

Chiralcel OD-H column (hexane/2-propanol = 92:8, flow rate 1.0 mL/min,  $\lambda = 254$  nm),  $t_R = 8.42$  min (major),  $t_R = 9.87$  min (minor).  $[\alpha]_D^{25} = +41.6^\circ$  ( $c = 0.14$  g/100 mL,  $\text{CHCl}_3$ , 96% ee); IR (Neat):  $\nu_{\text{max}}$  3520, 3442, 3285 (O-H), 2940, 2868, 1694 (C=O), 1445, 1409, 1311, 1230, 1128, 1037, 1017, 763, 652 and 625  $\text{cm}^{-1}$ ;  $^1\text{H}$  NMR ( $\text{CDCl}_3$ )  $\delta$  7.52 (1H, d,  $J = 8.0$  Hz), 7.47 (1H, d,  $J = 8.0$  Hz), 7.39 (1H, t,  $J = 7.6$  Hz), 7.24 (1H, t,  $J = 7.6$  Hz) [Ar-*H*]; 5.39 (1H, d,  $J = 8.4$  Hz, CHOH), 4.04 (1H, br s, OH), 3.27 (1H, s, Ar-C $\equiv$ CH), 2.73–2.66 (1H, m), 2.46 (1H, d,  $J = 13.2$  Hz), 2.34 (1H, dt,  $J = 13.2, 6.0$  Hz), 2.09–2.04 (1H, m), 1.82–1.79 (1H, m), 1.74–1.66 (1H, m), 1.61–1.51 (3H, m);  $^{13}\text{C}$  NMR ( $\text{CDCl}_3$ , DEPT-135)  $\delta$  215.4 (C, C=O), 143.7 (C), 132.5 (CH), 129.3 (CH), 127.3 (CH), 126.4 (CH), 120.9 (C), 81.8 (CH, Ar-C $\equiv$ CH), 81.7 (C, Ar-C $\equiv$ CH), 71.6 (CH, CHOH), 57.7 (CH,  $\text{COCH}_2$ ), 42.6 ( $\text{CH}_2$ ), 30.4 ( $\text{CH}_2$ ), 27.7 ( $\text{CH}_2$ ), 24.8 ( $\text{CH}_2$ ); LRMS  $m/z$  228.20 ( $\text{M}^+$ ), calcd. for  $\text{C}_{15}\text{H}_{16}\text{O}_2$  228.1150; Anal. calcd. for  $\text{C}_{15}\text{H}_{16}\text{O}_2$  (228.1150); C, 78.92, H, 7.06; Found: C, 78.81; H, 7.15%.

**(2*R*,1'*R*)-2-[(2-Ethynylphenyl)-hydroxymethyl]-cyclohexanone (*syn*-5ad):** Prepared

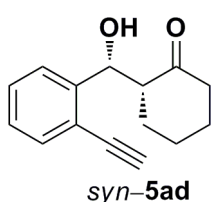

following Method-A, purified by column chromatography using EtOAc/hexane and isolated as liquid. The enantiomeric excess (ee) was determined by chiral stationary phase HPLC using a Daicel Chiralpak AS-H column (hexane/2-propanol = 94:6, flow rate 1.0 mL/min,  $\lambda$  = 254 nm),  $t_R$  = 10.65 min (minor),  $t_R$  = 11.98 min (major).  $[\alpha]_D^{25} = +108.8^\circ$  ( $c$  = 0.06 g/100 mL,  $\text{CHCl}_3$ , 91% ee); IR (Neat):  $\nu_{\text{max}}$  3459, 3291 (O-H), 3061, 2940, 2866, 1703 (C=O), 1605, 1449, 1308, 1235, 1130, 1065, 1032, 978, 887 and 762  $\text{cm}^{-1}$ ;  $^1\text{H}$  NMR ( $\text{CDCl}_3$ )  $\delta$  7.55 (1H, d,  $J$  = 7.8 Hz), 7.46 (1H, d,  $J$  = 7.6 Hz), 7.37 (1H, t,  $J$  = 7.6 Hz), 7.22 (1H, t,  $J$  = 7.5 Hz) [Ar-H]; 5.80 (1H, br s, CHOH), 3.29 (1H, s, Ar-C $\equiv$ CH), 3.19 (1H, br s, OH), 2.88 (1H, dd,  $J$  = 12.6, 5.2 Hz), 2.47–2.35 (2H, m), 2.10–2.04 (1H, m), 1.84–1.49 (5H, m);  $^{13}\text{C}$  NMR ( $\text{CDCl}_3$ , DEPT-135)  $\delta$  214.8 (C, C=O), 143.8 (C), 132.7 (CH), 128.7 (CH), 126.7 (CH), 126.5 (CH), 118.5 (C), 82.6 (CH, Ar-C $\equiv$ CH), 81.2 (C, Ar-C $\equiv$ CH), 68.7 (CH, CHOH), 54.6 (CH, COCH), 42.5 (CH<sub>2</sub>), 27.9 (CH<sub>2</sub>), 25.9 (CH<sub>2</sub>), 24.8 (CH<sub>2</sub>); LRMS  $m/z$  228.70 ( $M+1$ ), calcd. for  $\text{C}_{15}\text{H}_{16}\text{O}_2$  228.1150; Anal. calcd. for  $\text{C}_{15}\text{H}_{16}\text{O}_2$  (228.1150); C, 78.92, H, 7.06; Found: C, 78.82; H, 6.95%.

**(2*S*,1'*R*)-2-[(2-Ethynylphenyl)-hydroxymethyl]-cyclopentanone (*anti*-5ae):**

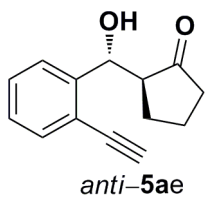

Prepared following Method-A, purified by column chromatography using EtOAc/hexane and isolated as liquid. The enantiomeric excess (ee) was determined by chiral stationary phase HPLC using a Daicel Chiralpak AD-H column (hexane/2-propanol = 90:10, flow rate 1.0 mL/min,  $\lambda$  = 254 nm),  $t_R$  = 10.51 min (major),  $t_R$  = 12.42 min (minor).  $[\alpha]_D^{25} = -23.8^\circ$  ( $c$  = 0.71 g/100 mL,  $\text{CHCl}_3$ , 95% ee); IR (Neat):  $\nu_{\text{max}}$  3281 (O-H), 3065, 2967, 2882, 2102, 1937, 1728 (C=O), 1622, 1402, 1159, 1026, 841 and 766  $\text{cm}^{-1}$ ;  $^1\text{H}$  NMR ( $\text{CDCl}_3$ )  $\delta$  7.56 (1H, dd,  $J$  = 8.0, 0.8 Hz), 7.48 (1H, dd,  $J$  = 8.0, 1.2 Hz), 7.41 (1H, dt,  $J$  = 8.0, 1.2 Hz), 7.25 (1H, dt,  $J$  = 7.6, 1.2 Hz) [Ar-H]; 5.33 (1H, d,  $J$  = 9.6 Hz, CHOH), 4.58 (1H, br s, OH), 3.27 (1H, s, Ar-C $\equiv$ CH), 2.50–2.40 (2H, m), 2.36–2.26 (1H, m), 2.05–1.95 (1H, m), 1.80–1.65 (3H, m);  $^{13}\text{C}$  NMR ( $\text{CDCl}_3$ , DEPT-135)  $\delta$  223.2 (C, C=O), 143.8 (C),

132.8 (CH), 129.5 (CH), 127.6 (CH), 126.5 (CH), 120.4 (C), 81.9 (C, Ar-C≡CH), 81.8 (CH, Ar-C≡CH), 71.8 (CH, CHOH), 55.7 (CH), 38.7 (CH<sub>2</sub>), 26.4 (CH<sub>2</sub>), 20.5 (CH<sub>2</sub>); LRMS *m/z* 213.10 (M-1), calcd. for C<sub>14</sub>H<sub>14</sub>O<sub>2</sub> 214.0994; Anal. calcd. for C<sub>14</sub>H<sub>14</sub>O<sub>2</sub> (214.0994); C, 78.48, H, 6.59; Found: C, 78.32; H, 6.65%.

**(2*R*,1'*R*)-2-[(2-Ethynylphenyl)-hydroxymethyl]-cyclopentanone (*syn*-5ae):** Prepared

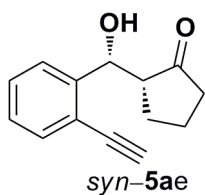

following Method-B, purified by column chromatography using EtOAc/hexane and isolated as liquid. The enantiomeric excess (ee) was determined by chiral stationary phase HPLC using a Daicel Chiralpak AS-H column (hexane/2-propanol = 90:10, flow rate 1.0

mL/min,  $\lambda$  = 254 nm),  $t_R$  = 11.52 min.,  $t_R$  = 14.61 min., **0% ee**; IR (Neat):  $\nu_{\max}$  3443, 3291 (O-H), 3065, 2965, 2882, 1736 (C=O), 1622, 1478, 1449, 1402, 1337, 1269, 1204, 1157, 1107, 1026, 968, 883, 841 and 762 cm<sup>-1</sup>; <sup>1</sup>H NMR (CDCl<sub>3</sub>)  $\delta$  7.57 (1H, d,  $J$  = 7.6 Hz), 7.47 (1H, dd,  $J$  = 7.6, 1.2 Hz), 7.39 (1H, dt,  $J$  = 7.6, 0.8 Hz), 7.24 (1H, dt,  $J$  = 7.6, 1.2 Hz)[Ar-*H*]; 5.78 (1H, s, CHOH), 3.36 (1H, s, Ar-C≡CH), 2.77–2.72 (1H, m), 2.41–2.33 (2H, m), 2.20–2.10 (1H, m), 2.03–1.95 (2H, m), 1.76–1.65 (2H, m); <sup>13</sup>C NMR (CDCl<sub>3</sub>, DEPT-135)  $\delta$  220.1 (C, C=O), 145.0 (C), 132.7 (CH), 129.0 (CH), 127.0 (CH), 125.5 (CH), 118.8 (C), 83.0 (CH, Ar-C≡CH), 80.9 (C, Ar-C≡CH), 69.2 (CH, CHOH), 54.3 (CH), 39.0 (CH<sub>2</sub>), 22.6 (CH<sub>2</sub>), 20.3 (CH<sub>2</sub>); LRMS *m/z* 213.10 (M-1), calcd. for C<sub>14</sub>H<sub>14</sub>O<sub>2</sub> 214.0994; Anal. calcd. for C<sub>14</sub>H<sub>14</sub>O<sub>2</sub> (214.0994); C, 78.48, H, 6.59; Found: C, 78.36; H, 6.51%.

**(2*S*,4*S*,1'*R*)-2-[(2-Ethynylphenyl)-hydroxymethyl]-4-methyl-cyclohexanone**

**[(2*S*,4*S*,1'*R*)-5af]:** Prepared following Method-A, purified by column chromatography

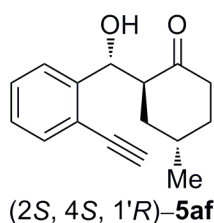

using EtOAc/hexane and isolated as a yellow liquid. The enantiomeric excess (ee) was determined by chiral stationary phase HPLC using a Daicel Chiralcel OJ-H column (hexane/2-propanol = 96:4, flow rate 1.0 mL/min,  $\lambda$  = 254 nm),  $t_R$  = 17.37 min (minor),  $t_R$  = 18.55 min (major).  **$[\alpha]_D^{25} = -8.1^\circ$  ( $c$  = 0.15 g/100 mL, CHCl<sub>3</sub>, >99%**

***de* and 96% ee)**; IR (Neat):  $\nu_{\max}$  3443, 3267 (O-H), 2961, 2876, 2830, 1708 (C=O),

1452, 1379, 1327, 1187, 1125, 1099, 1038, 951 and 763  $\text{cm}^{-1}$ ;  $^1\text{H}$  NMR ( $\text{CDCl}_3$ )  $\delta$  7.51–7.47 (2H, m), 7.39 (1H, t,  $J = 7.6$  Hz), 7.27–7.23 (1H, m)[Ar-*H*]; 5.40 (1H, d,  $J = 8.4$  Hz, *CHOH*), 3.71 (1H, br s, OH), 3.30 (1H, s, Ar- $\text{C}\equiv\text{CH}$ ), 2.86 (1H, dd,  $J = 8.8, 2.8$  Hz), 2.53–2.40 (2H, m), 2.17–2.10 (1H, m), 2.00–1.92 (1H, m), 1.76–1.64 (2H, m), 1.40–1.34 (1H, m), 1.01 (3H, d,  $J = 6.8$  Hz,  $\text{CH}_3$ );  $^{13}\text{C}$  NMR ( $\text{CDCl}_3$ , DEPT-135)  $\delta$  215.3 (C,  $\text{C}=\text{O}$ ), 144.0 (C), 132.7 (CH), 129.4 (CH), 127.5 (CH), 126.4 (CH), 120.7 (C), 81.9 (CH, Ar- $\text{C}\equiv\text{CH}$ ), 81.7 (C, Ar- $\text{C}\equiv\text{CH}$ ), 72.0 (CH, *CHOH*), 54.0 (CH), 38.4 ( $\text{CH}_2$ ), 36.1 ( $\text{CH}_2$ ), 33.6 ( $\text{CH}_2$ ), 26.9 (CH), 18.7 ( $\text{CH}_3$ ); LRMS  $m/z$  243.10 ( $\text{M}+1$ ), calcd. for  $\text{C}_{16}\text{H}_{18}\text{O}_2$  242.1307; Anal. calcd. for  $\text{C}_{16}\text{H}_{18}\text{O}_2$  (242.1307); C, 79.31, H, 7.49; Found: C, 79.45; H, 7.41%.

**(2*R*,4*R*)-2-((*S*)-(2-ethynylphenyl)(hydroxy)methyl)-4-methylcyclohexanone (5af):**

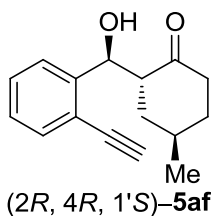

Prepared following Method-A, purified by column chromatography using EtOAc/hexane and isolated as liquid. The enantiomeric excess (ee) was determined by chiral stationary phase HPLC using a Daicel Chiralpak OJ-H column (hexane/2-propanol = 96:4, flow rate 1.0 mL/min,  $\lambda = 254$  nm),  $t_R = 15.38$  min (major),  $t_R = 16.96$  min (minor).  $[\alpha]_D^{25} = +3.3^\circ$  ( $c = 0.67$  g/100 mL,  $\text{CHCl}_3$ , >99% *de* and 96% *ee*); IR (Neat):  $\lambda_{\text{max}}$  3499 (O-H), 2951, 1707 ( $\text{C}=\text{O}$ ), 1493, 1443, 1035, 757, 664 and 647  $\text{cm}^{-1}$ ;  $^1\text{H}$  NMR ( $\text{CDCl}_3$ )  $\delta$  7.47 (1H, d,  $J = 7.6$  Hz), 7.46 (1H, d,  $J = 7.2$  Hz), 7.36 (1H, t,  $J = 7.6$  Hz), 7.22 (1H, t,  $J = 7.6$  Hz), 5.40 (1H, d,  $J = 8.8$  Hz), 3.76 (1H, br s), 3.30 (1H, s, Ar- $\text{C}\equiv\text{CH}$ ), 2.84 (1H, q,  $J = 8.8$  Hz), 2.47–2.42 (2H, m), 2.15–2.12 (1H, m), 1.97–1.91 (1H, m), 1.73–1.62 (2H, m), 1.37–1.31 (1H, m), 1.00 (3H, d,  $J = 6.8$  Hz,  $\text{CH}_3$ );  $^{13}\text{C}$  NMR ( $\text{CDCl}_3$ , DEPT-135)  $\delta$  215.2 (C,  $\text{C}=\text{O}$ ), 144.0 (C), 132.7 (CH), 129.4 (CH), 127.4 (CH), 126.3 (CH), 120.7 (C), 81.9 (CH, Ar- $\text{C}\equiv\text{CH}$ ), 81.6 (C, Ar- $\text{C}\equiv\text{CH}$ ), 71.9 (CH, *CHOH*), 54.1 (CH), 38.4 ( $\text{CH}_2$ ), 36.1 ( $\text{CH}_2$ ), 33.6 ( $\text{CH}_2$ ), 26.9 (CH), 18.7 ( $\text{CH}_3$ ); LRMS  $m/z$  243.10 ( $\text{M}+1$ ), calcd. for  $\text{C}_{16}\text{H}_{18}\text{O}_2$  242.1307; Anal. calcd. for  $\text{C}_{16}\text{H}_{18}\text{O}_2$  (242.1307); C, 79.31, H, 7.49; Found: C, 79.26; H, 7.55%.

**(2*S*,4*R*,1'*R*)-2-[(2-Ethynylphenyl)-hydroxymethyl]-4-methyl-cyclohexanone**

**[(2*S*,4*R*,1'*R*)-5af]:** Prepared following Method-B, purified by column chromatography

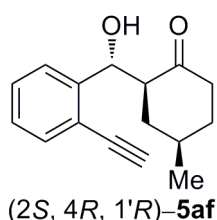

using EtOAc/hexane and isolated as liquid. The enantiomeric excess (ee) was determined by chiral stationary phase HPLC using a Daicel Chiralpak AD-H column (hexane/2-propanol = 94:6, flow rate 1.0 mL/min,  $\lambda$  = 254 nm),  $t_R$  = 8.67 min (minor),  $t_R$  = 11.43 min (major).

$[\alpha]_D^{25} = -172.7^\circ$  ( $c$  = 0.14 g/100 mL, CHCl<sub>3</sub>, 77% ee); IR (Neat):

$\nu_{\max}$  3415, 3298 (O-H), 3279, 2955, 2874, 1704 (C=O), 1451, 1306, 1258, 1220, 1198, 1121 1077, 1021 and 763 cm<sup>-1</sup>; <sup>1</sup>H NMR (CDCl<sub>3</sub>)  $\delta$  7.53 (1H, d,  $J$  = 7.6 Hz), 7.47 (1H, dd,  $J$  = 7.6, 1.2 Hz), 7.38 (1H, dt,  $J$  = 7.6, 1.2 Hz), 7.23 (1H, dt,  $J$  = 7.6, 1.2 Hz) [Ar-H]; 5.79 (1H, s, CHOH), 3.31 (1H, s, Ar-C $\equiv$ CH), 3.14–3.09 (1H, m), 3.03 (1H, d,  $J$  = 2.4 Hz), 2.59–2.51 (1H, m), 2.38–2.31 (1H, m), 2.13–2.01 (2H, m), 1.95–1.88 (1H, m), 1.79–1.74 (1H, m), 1.35–1.29 (1H, m), 1.03 (3H, d,  $J$  = 6.8 Hz, CH<sub>3</sub>); <sup>13</sup>C NMR (CDCl<sub>3</sub>, DEPT-135)  $\delta$  215.3 (C, C=O), 143.7 (C), 132.9 (CH), 128.9 (CH), 126.8 (CH), 126.6 (CH), 118.6 (C), 82.6 (CH, Ar-C $\equiv$ CH), 81.3 (C, Ar-C $\equiv$ CH), 69.2 (CH, CHOH), 50.2 (CH), 38.3 (CH<sub>2</sub>), 33.1 (CH<sub>2</sub>), 31.7 (CH<sub>2</sub>), 26.7 (CH), 18.3 (CH<sub>3</sub>); LRMS  $m/z$  243.10 (M+1), calcd. for C<sub>16</sub>H<sub>18</sub>O<sub>2</sub> 242.1307; Anal. calcd. for C<sub>16</sub>H<sub>18</sub>O<sub>2</sub> (242.1307); C, 79.31, H, 7.49; Found: C, 79.45; H, 7.53%.

**(2*R*, 4*R*)-2-[(*S*)-Hydroxy-(2-(phenylethynyl)phenyl)methyl]-4-methylcyclohexanone**

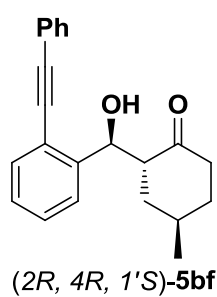

**(5bf):** Prepared following Method-A, purified by column chromatography using EtOAc/hexane and isolated as liquid. The enantiomeric excess (ee) was determined by chiral stationary phase HPLC using a Daicel Chiralpak AD-H column (hexane/2-propanol = 94:6, flow rate 1.0 mL/min,  $\lambda$  = 254 nm),  $t_R$  = 18.33 min (major),  $t_R$  = 22.77 min (minor).  $[\alpha]_D^{25} = +109.2^\circ$  ( $c$  = 0.26 g/100 mL, CHCl<sub>3</sub>,

>99% de and 90% ee); IR (Neat):  $\lambda_{\max}$  3353 (O-H), 2929, 1711 (C=O), 1493, 1038, 757, 686 and 633 cm<sup>-1</sup>; <sup>1</sup>H NMR (CDCl<sub>3</sub>)  $\delta$  7.56–7.54 (4H, m), 7.41–7.38 (4H, m), 7.29 (1H, t,  $J$  = 6.0 Hz), 5.53–5.51 (1H, m), 2.96 (1H, q,  $J$  = 6.4 Hz), 2.50 (2H, t,  $J$  = 5.2 Hz), 2.22–2.18 (1H, m), 1.98–1.95 (1H, m), 1.81–1.76 (1H, m), 1.68–1.66 (1H, m), 1.47–

1.45 (1H, m) 1.00-0.98 (3H, br s, CH<sub>3</sub>); <sup>13</sup>C NMR (CDCl<sub>3</sub>, DEPT-135) δ 215.1 (C, C=O), 143.6 (C), 132.2 (CH), 131.5 (2 x CH), 129.0 (CH), 128.5 (CH), 128.5 (2 x CH), 127.6 (CH), 126.6 (CH), 123.0 (C), 121.8 (C), 94.1 (CH, Ar-C≡CH), 87.5 (C, Ar-C≡CH), 72.4 (CH, CHOH), 54.4 (CH), 38.6 (CH<sub>2</sub>), 36.6 (CH<sub>2</sub>), 33.9 (CH<sub>2</sub>), 27.1 (CH), 19.0 (CH<sub>3</sub>); LRMS m/z 319.20 (M+1), calcd. for C<sub>22</sub>H<sub>22</sub>O<sub>2</sub> 318.1620; Anal. calcd. for C<sub>22</sub>H<sub>22</sub>O<sub>2</sub> (318.1620); C, 82.99, H, 6.96; Found: C, 82.85; H, 6.88%.

**(2S,4S)-2-[(R)-Hydroxy-(2-(phenylethynyl)phenyl)methyl]-4-methylcyclohexanone**

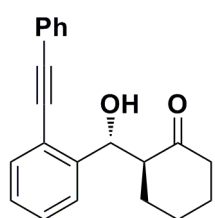

(2S, 4S, 1'R)-**5bf**

**(5bf):** Prepared following Method-A, purified by column chromatography using EtOAc/hexane and isolated as liquid. The enantiomeric excess (ee) was determined by chiral stationary phase HPLC using a Daicel Chiralpak AD-H column (hexane/2-propanol = 94:6, flow rate 1.0 mL/min, λ = 254 nm), *t*<sub>R</sub> = 18.33 min (minor), *t*<sub>R</sub> = 22.77 min (major). [*α*]<sub>D</sub><sup>25</sup> = -89.2° (*c* = 0.37 g/100 mL, CHCl<sub>3</sub>, >99% *de* and 86% *ee*); IR (Neat): λ<sub>max</sub> 3353 (O-H), 2929, 1711 (C=O), 1493, 1038, 757, 686 and 633 cm<sup>-1</sup>.

**(S)-3-((R)-(2-ethynylphenyl)(hydroxy)methyl)dihydro-2H-pyran-4(3H)-one (5ag):**

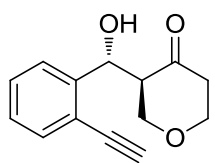

**anti-5ag**

Prepared following Method-A, purified by column chromatography using EtOAc/hexane and isolated as liquid. The enantiomeric excess (ee) was determined by chiral stationary phase HPLC using a Daicel Chiralpak AD-H column (hexane/2-propanol = 90:10, flow rate 1.0 mL/min, λ = 254 nm), *t*<sub>R</sub>(*syn*) = 9.31 min (major), *t*<sub>R</sub>(*syn*) = 10.84 min (minor); *t*<sub>R</sub>(*anti*) = 13.79 min (minor), *t*<sub>R</sub>(*anti*) = 15.17 min (major). [*α*]<sub>D</sub><sup>25</sup> = +206.3° (*c* = 0.06 g/100 mL, CHCl<sub>3</sub>, 93% *ee*); IR (Neat): λ<sub>max</sub> 3423 (O-H), 1708 (C=O), 1208, 760, 684, 666, 648 and 635 cm<sup>-1</sup>; <sup>1</sup>H NMR (CDCl<sub>3</sub>, **8.2:1 mixture of anti:syn diastereomers**) δ 7.54 (1H, d, *J* = 8.0 Hz), 7.50 (1H, d, *J* = 7.6 Hz), 7.47 (2H, d, *J* = 7.6 Hz), 7.42-7.35 (2H, m), 7.27-7.21 (2H, m) [Ar-*H*], 5.84 (1H, br s), 5.39 (1H, br d, *J* = 7.2 Hz), 4.22-4.16 (2H, m), 3.91 (1H, br s), 3.82 (2H, d, *J* = 8.4 Hz), 3.79-3.68 (3H, m), 3.60 (1H, dd, *J* = 11.2, 10.0 Hz), 3.33 (1H, s, Ar-C≡CH), 3.32 (1H, s, Ar-C≡CH), 3.19-3.14 (1H, m), 3.04-2.99 (2H, m), 2.71-2.62 (2H, m), 2.48 (2H, tt, *J* = 15.2, 3.2 Hz); <sup>13</sup>C NMR (CDCl<sub>3</sub>,

DEPT-135, **8.2:1 mixture of *anti*:*syn* diastereomers**)  $\delta$  210.1 (C, C=O), 209.0 (C), 142.9 (C), 142.8 (C), 133.0 (CH), 132.9 (CH), 129.6 (CH), 129.1 (CH), 127.8 (CH), 127.2 (CH), 126.5 (CH), 125.9 (CH), 120.2 (C), 118.8 (C), 83.1 (CH, Ar-C $\equiv$ CH), 82.5 (CH, Ar-C $\equiv$ CH), 81.3 (C, Ar-C $\equiv$ CH), 81.0 (C, Ar-C $\equiv$ CH), 70.0 (CH<sub>2</sub>), 69.4 (CH), 68.4 (CH<sub>2</sub>), 68.3 (CH<sub>2</sub>), 67.9 (CH<sub>2</sub>), 67.8 (CH), 58.2 (CH), 55.3 (CH), 43.1 (CH<sub>2</sub>), 43.0 (CH<sub>2</sub>); LRMS  $m/z$  231.10 (M+1), calcd. for C<sub>14</sub>H<sub>14</sub>O<sub>3</sub> 230.0943; Anal. calcd. for C<sub>14</sub>H<sub>14</sub>O<sub>3</sub> (230.0943); C, 73.03, H, 6.13; Found: C, 73.21; H, 6.18%.

**(S)-3-((R)-(2-ethynylphenyl)(hydroxy)methyl)dihydro-2H-thiopyran-4(3H)-one**

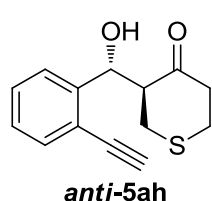

**(5ah):** Prepared following method **A** in THF, purified by column chromatography using EtOAc/hexane and isolated as liquid. The enantiomeric excess (ee) was determined by chiral stationary phase HPLC using a Daicel Chiralpak AD-H column (hexane/2-propanol =

90:10, flow rate 1.0 mL/min,  $\lambda$  = 254 nm),  $t_R$  = 14.74 min (minor),  $t_R$  = 16.44 min (major);  $[\alpha]_D^{25} = +26.2^\circ$  ( $c$  = 0.16 g/100 mL, CHCl<sub>3</sub>, 99% *de*, 88% *ee*); IR (Neat):  $\lambda_{max}$  3428 (O-H), 2924, 1703 (C=O), 1425, 1287, 1107, 1018 and 762 cm<sup>-1</sup>; <sup>1</sup>H NMR (CDCl<sub>3</sub>)  $\delta$  7.54 (1H, d,  $J$  = 7.5 Hz), 7.49 (1H, d,  $J$  = 8.0 Hz), 7.41 (1H, t,  $J$  = 7.5 Hz), 7.27 (1H, t,  $J$  = 7.5 Hz) [Ar-*H*]; 5.48 (1H, dd,  $J$  = 8.0, 3.5 Hz), 3.75-3.71 (1H, m, OH), 3.32 (1H, s, Ar-C $\equiv$ CH), 3.12-3.08 (1H, m), 3.02-2.94 (2H, m), 2.85-2.78 (3H, m), 2.53-2.49 (1H, m); <sup>13</sup>C NMR (CDCl<sub>3</sub>, DEPT-135)  $\delta$  212.0 (C, C=O), 142.8 (C), 132.8 (CH), 129.6 (CH), 127.8 (CH), 126.6 (CH), 120.7 (C), 82.5 (CH, Ar-C $\equiv$ CH), 81.5 (C, Ar-C $\equiv$ CH), 71.3 (CH), 59.9 (CH), 45.0 (CH<sub>2</sub>), 32.8 (CH<sub>2</sub>), 30.9 (CH<sub>2</sub>); LRMS  $m/z$  247.20 (M+1), calcd. for C<sub>14</sub>H<sub>14</sub>O<sub>2</sub>S 246.0715; Anal. calcd. for C<sub>14</sub>H<sub>14</sub>O<sub>2</sub>S (246.0715); C, 68.26, H, 5.73; Found: C, 68.15; H, 5.78%.

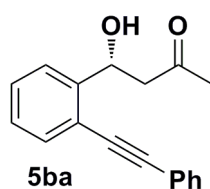

**(R)-4-Hydroxy-4-(2-phenylethynylphenyl)-butan-2-one (5ba):**

Prepared following Method-**B**, purified by column chromatography using EtOAc/hexane and isolated as white solid. The enantiomeric excess (ee) was determined by chiral stationary phase HPLC using a

Daicel Chiralcel AD-H column (hexane/2-propanol = 94:6, flow rate 1.0 mL/min,  $\lambda$  = 254 nm),  $t_R$  = 13.52 min (major),  $t_R$  = 15.56 min (minor).  $[\alpha]_D^{25} = +52.2^\circ$  ( $c$  = 0.54



g/100 mL, CHCl<sub>3</sub>, **76% ee**; IR (Neat):  $\nu_{\max}$  3352 (O-H), 2929, 1706 (C=O), 1494, 1406, 1365, 1260, 1186, 1164, 1102, 1064, 756, 690 and 664 cm<sup>-1</sup>; <sup>1</sup>H NMR (CDCl<sub>3</sub>)  $\delta$  7.61 (1H, d, *J* = 8.0 Hz), 7.51–7.47 (3H, m), 7.40–7.34 (4H, m), 7.26 (1H, t, *J* = 8.0 Hz)[Ar-*H*]; 5.69 (1H, d, *J* = 8.0 Hz, CHOH), 3.48 (1H, br s, OH), 3.07 (1H, dd, *J* = 17.6, 1.6 Hz, COCH<sub>2</sub>), 2.77 (1H, dd, *J* = 17.6, 9.6 Hz, COCH<sub>2</sub>), 2.19 (3H, s, COCH<sub>3</sub>); <sup>13</sup>C NMR (CDCl<sub>3</sub>, DEPT-135)  $\delta$  209.2 (C, C=O), 144.5 (C), 132.0 (CH), 131.4 (2 x CH), 128.9 (CH), 128.51 (CH), 128.45 (2 x CH), 127.2 (CH), 125.1 (CH), 122.8 (C), 119.9 (C), 94.9 (C, Ar-C≡CPh), 86.6 (C, Ar-C≡CPh), 68.0 (CH, CHOH), 50.9 (CH<sub>2</sub>, COCH<sub>2</sub>), 30.7 (CH<sub>3</sub>, COCH<sub>3</sub>); LRMS *m/z* 263.00 (M-1), calcd. for C<sub>18</sub>H<sub>16</sub>O<sub>2</sub> 264.1150; Anal. calcd. for C<sub>18</sub>H<sub>16</sub>O<sub>2</sub> (264.1150); C, 81.79; H, 6.10. Found: C, 81.65; H, 6.22%.

**(*R,R*)-1,5-Dihydroxy-1,5-bis-(2-phenylethynylphenyl)-pentan-3-one (6ba):** Prepared

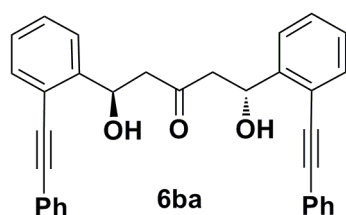

following Method-A, purified by column chromatography using EtOAc/hexane and isolated as yellow gummy liquid.

The enantiomeric excess (ee) was determined by chiral stationary phase HPLC using a Daicel Chiralpak AD-H column (hexane/2-propanol = 94:6, flow rate 1.0 mL/min,  $\lambda$  = 254 nm), *t*<sub>R</sub> = 56.27 min (minor), *t*<sub>R</sub> = 61.58 min (major), **>99.9% ee**. IR (Neat):  $\nu_{\max}$  3410 (O-H), 3059, 2926, 2216, 1960, 1713 (C=O), 1597, 1493, 1447, 1389, 1267, 1063, 756 and 691 cm<sup>-1</sup>; <sup>1</sup>H NMR (CDCl<sub>3</sub>)  $\delta$  7.58 (4H, d, *J* = 7.0 Hz), 7.51–7.48 (8H, m), 7.34–7.32 (6H, m)[Ar-*H*]; 5.78 (2H, dd, *J* = 9.9, 2.1 Hz, 2 x CHOH), 3.20 (2H, br s, OH), 3.09 (2H, dd, *J* = 16.8, 2.4 Hz, COCH<sub>2</sub>), 2.86 (2H, dd, *J* = 16.8, 9.8 Hz, COCH<sub>2</sub>); <sup>13</sup>C NMR (CDCl<sub>3</sub>, DEPT-135)  $\delta$  210.8 (C, C=O), 144.4 (2 x C), 132.1 (2 x CH), 131.5 (4 x CH), 128.9 (2 x CH), 128.6 (2 x CH), 128.5 (4 x CH), 127.3 (2 x CH), 125.1 (2 x CH), 122.8 (2 x C), 120.0 (2 x C), 95.2 (2 x C, 2 x Ar-C≡CPh), 86.5 (2 x C, 2 x Ar-C≡CPh), 68.1 (2 x CH, 2 x CHOH), 51.1 (2 x CH<sub>2</sub>, 2 x COCH<sub>2</sub>); LRMS *m/z* 471.30 (M<sup>+</sup> + 1), calcd. for C<sub>33</sub>H<sub>26</sub>O<sub>3</sub> 470.1882; Anal. calcd. for C<sub>33</sub>H<sub>26</sub>O<sub>3</sub> (470.1882); C, 84.23; H, 5.57. Found: C, 84.15; H, 5.63%.

**(*R,R*)-4-Hydroxy-4-(2-{4-[2-(1-hydroxy-3-oxobutyl)phenyl]buta-1,3-diynyl}-phenyl)butan-2-one (5ca, major) and (*R,S*)-4-Hydroxy-4-(2-{4-[2-(1-hydroxy-3-oxobutyl)phenyl]buta-1,3-diynyl}-phenyl)butan-2-one (5ca, minor):** Prepared

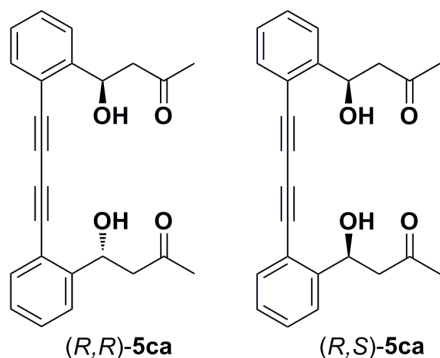

following Method-A, purified by column chromatography using EtOAc/hexane and isolated as yellow liquid. The enantiomeric excess (ee) was determined by chiral stationary phase HPLC using a Daicel Chiralcel OJ-H column (hexane/2-propanol = 94:6, flow rate 1.0 mL/min,  $\lambda = 254$  nm),  $t_R = 44.46$  min (minor),  $t_R = 57.34$  min

(major).  $[\alpha]_D^{25} = +69.5^\circ$  ( $c = 0.27$  g/100 mL,  $\text{CHCl}_3$ , **21:1 dr** and **>99% ee**); IR (Neat):  $\nu_{\text{max}}$  3432 (O-H), 3065, 2920, 2213, 2143, 1715 (C=O), 1711 (C=O), 1476, 1447, 1362, 1233, 1163, 1107, 1067, 955, 887, 818 and 762  $\text{cm}^{-1}$ ;  $^1\text{H}$  NMR ( $\text{CDCl}_3$ , **major isomer**)  $\delta$  7.61 (2H, d,  $J = 7.8$  Hz), 7.51 (2H, d,  $J = 7.2$  Hz), 7.41 (2H, dt,  $J = 7.6, 1.0$  Hz), 7.25 (2H, dt,  $J = 7.6, 1.2$  Hz)[Ar-H]; 5.56 (2H, dd,  $J = 9.6, 2.0$  Hz, 2 x CHOH), 3.69 (2H, br s, 2 x OH), 2.99 (2H, dd,  $J = 17.4, 2.4$  Hz,  $\text{COCH}_2$ ), 2.76 (2H, dd,  $J = 17.4, 9.6$  Hz,  $\text{COCH}_2$ ), 2.24 (6H, s, 2 x  $\text{COCH}_3$ );  $^{13}\text{C}$  NMR ( $\text{CDCl}_3$ , DEPT-135, **major isomer**)  $\delta$  209.15 (2 x C, 2 x C=O), 146.0 (2 x C), 133.23 (2 x CH), 129.9 (2 x CH), 127.3 (2 x CH), 125.5 (2 x CH), 118.42 (2 x C), 80.2 (2 x C), 78.5 (2 x C), 67.8 (2 x CH, 2 x CHOH), 50.9 (2 x  $\text{CH}_2$ , 2 x  $\text{COCH}_2$ ), 30.6 (2 x  $\text{CH}_3$ , 2 x  $\text{COCH}_3$ ); LRMS  $m/z$  375.30 (M+1), calcd. for  $\text{C}_{24}\text{H}_{22}\text{O}_4$  374.1518; Anal. calcd. for  $\text{C}_{24}\text{H}_{22}\text{O}_4$  (374.1518); C, 76.99; H, 5.92. Found: C, 76.85; H, 5.98%.

**(4*R*,4'*R*)-4,4'-((1,1'-(1,2-phenylenebis(methylene))bis(1*H*-1,2,3-triazole-4,1-diyl))bis(2,1-phenylene))bis(4-hydroxybutan-2-one)**

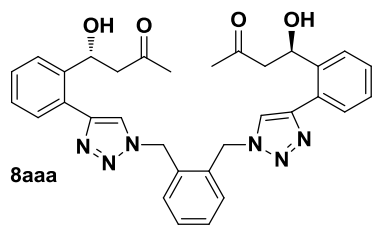

**(8aaa):** Prepared following Method-C, purified by column chromatography using EtOAc/hexane and isolated as liquid.  $[\alpha]_D^{25} = +60.5^\circ$  ( $c = 0.385$  g/100 mL,  $\text{CHCl}_3$ , **95% ee**); IR (Neat):  $\lambda_{\text{max}}$  3464 (O-H), 2359, 1708 (C=O), 1361, 1075, 911, 733, 681 and 673  $\text{cm}^{-1}$ ;  $^1\text{H}$  NMR ( $\text{CDCl}_3$ )  $\delta$  7.72 (1H, s),

7.53 (1H, d,  $J = 7.6$  Hz), 7.41-7.38 (1H, m), 7.34-7.29 (3H, m), 7.19 (1H, t,  $J = 7.6$  Hz), 5.68 (2H, ABq,  $J = 15.2$  Hz,  $\text{NCH}_2\text{Ar}$ ), 5.31 (1H, t,  $J = 5.6$  Hz,  $\text{CHOH}$ ), 2.89 (2H, d,  $J = 6.0$  Hz), 2.11 (3H, s,  $\text{CH}_3\text{CO}$ );  $^{13}\text{C}$  NMR ( $\text{CDCl}_3$ , DEPT-135)  $\delta$  208.7 (C,  $\text{C=O}$ ), 147.3 (C), 140.8 (C), 133.1 (C), 130.6 (CH), 129.9 (CH), 129.4 (CH), 128.8 (CH), 127.9 (C), 127.6 (CH), 126.6 (CH), 122.4 (CH), 67.2 (CH), 51.2 ( $\text{CH}_2$ ), 50.3 ( $\text{CH}_2$ ), 30.6 ( $\text{CH}_3$ ); HRMS  $m/z$  587.2383 ( $\text{M}+\text{Na}$ ), calcd. for  $\text{C}_{32}\text{H}_{32}\text{N}_6\text{O}_4\text{Na}$  587.2383; Anal. calcd. for  $\text{C}_{32}\text{H}_{32}\text{N}_6\text{O}_4$  (564.2485); C, 68.07; H, 5.71; N, 14.88; Found: C, 67.95; H, 5.69; N, 14.92%.

**(4*R*,4'*R*)-4,4'-((1,1'-(1,3-phenylenebis(methylene)))bis(1*H*-1,2,3-triazole-4,1-diyl))bis(2,1-phenylene))bis(4-hydroxybutan-2-one) (8aab):** Prepared following

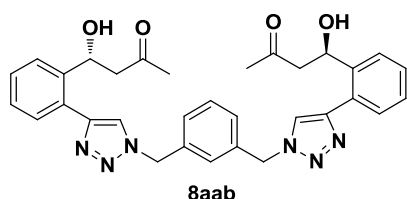

Method-C, purified by column chromatography using EtOAc/hexane and isolated as solid.  $[\alpha]_{\text{D}}^{25} = +48.5^\circ$  ( $c = 1.714$  g/100 mL,  $\text{CHCl}_3$ , 95% ee); IR (Neat):  $\lambda_{\text{max}}$  3446 (O-H), 2929, 1709 ( $\text{C=O}$ ), 1357, 1218, 1075, 760, 659 and 652  $\text{cm}^{-1}$ ;  $^1\text{H}$  NMR ( $\text{CDCl}_3$ )  $\delta$  7.78 (1H,

s), 7.52 (1H, d,  $J = 7.2$  Hz), 7.35-7.30 (2H, m), 7.28-7.25 (2H, m), 7.20-7.19 (2H, m), 5.51 (2H, s,  $\text{NCH}_2\text{Ar}$ ), 5.32-5.30 (1H, m,  $\text{CHOH}$ ), 4.80 (1H, br s, OH), 2.89-2.87 (2H, m), 2.10 (3H, s,  $\text{COCH}_3$ );  $^{13}\text{C}$  NMR ( $\text{CDCl}_3$ , DEPT-135)  $\delta$  208.7 (C,  $\text{C=O}$ ), 147.2 (C), 140.8 (C), 135.6 (C), 129.7 (CH), 129.3 (CH), 128.7 (CH), 128.1 (CH), 128.0 (C), 127.5 (CH), 127.2 (CH), 126.5 (CH), 122.3 (CH), 67.1 (CH), 53.5 ( $\text{CH}_2$ ), 50.3 ( $\text{CH}_2$ ), 30.6 ( $\text{CH}_3$ ); HRMS  $m/z$  587.2383 ( $\text{M}+\text{Na}$ ), calcd. for  $\text{C}_{32}\text{H}_{32}\text{N}_6\text{O}_4\text{Na}$  587.2383; Anal. calcd. for  $\text{C}_{32}\text{H}_{32}\text{N}_6\text{O}_4$  (564.2485); C, 68.07; H, 5.71; N, 14.88; Found: C, 68.12; H, 5.75; N, 14.78%.

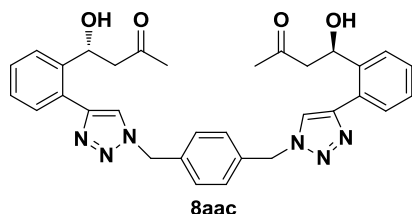

**(4*R*,4'*R*)-4,4'-((1,1'-(1,4-phenylenebis(methylene)))bis(1*H*-1,2,3-triazole-4,1-diyl))bis(2,1-phenylene))bis(4-hydroxybutan-2-one) (8aac):** Prepared following Method-C, purified

by column chromatography using EtOAc/hexane and isolated as liquid.  $[\alpha]_{\text{D}}^{25} = +47.4^\circ$  ( $c = 0.80$  g/100 mL,  $\text{CHCl}_3$ , 95% ee); IR (Neat):  $\lambda_{\text{max}}$  3421 (O-H), 2928, 1710 ( $\text{C=O}$ ),

1356, 1109, 1077, 764, 642 and 611  $\text{cm}^{-1}$ ;  $^1\text{H}$  NMR ( $\text{CDCl}_3$ )  $\delta$  7.74 (1H, s), 7.52 (1H, d,  $J = 8.0$  Hz), 7.36-7.30 (2H, m), 7.28 (2H, m), 7.21 (1H, t,  $J = 7.2$  Hz), 5.51 (2H, s,  $\text{NCH}_2\text{Ar}$ ), 5.31 (1H, t,  $J = 6.4$  Hz,  $\text{CHOH}$ ), 2.91 (2H, d,  $J = 6.4$  Hz), 2.11 (3H, s,  $\text{COCH}_3$ );  $^{13}\text{C}$  NMR ( $\text{CDCl}_3$ , DEPT-135)  $\delta$  208.7 (C,  $\text{C=O}$ ), 147.4 (C), 140.8 (C), 135.1 (C), 129.3 (CH), 128.7 (3 x CH), 128.0 (C), 127.5 (CH), 126.5 (CH), 122.1 (CH), 67.2 (CH), 53.5 ( $\text{CH}_2$ ), 50.1 ( $\text{CH}_2$ ), 30.6 ( $\text{CH}_3$ ); HRMS  $m/z$  587.2383 ( $\text{M}+\text{Na}$ ), calcd. for  $\text{C}_{32}\text{H}_{32}\text{N}_6\text{O}_4\text{Na}$  587.2383; Anal. calcd. for  $\text{C}_{32}\text{H}_{32}\text{N}_6\text{O}_4$  (564.2485); C, 68.07, H, 5.71; N, 14.88; Found: C, 68.15; H, 5.75; N, 14.76%.

**(R, R)-Cyclic double click product (9aab):** Prepared following Method-D, purified by

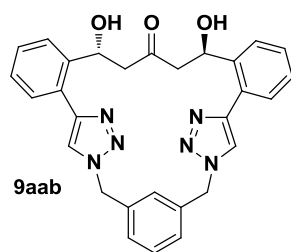

column chromatography using EtOAc/hexane and isolated as white solid.  $[\alpha]_D^{25} = +3.0^\circ$  ( $c = 0.42$  g/100 mL,  $\text{CHCl}_3$ , 99% ee); IR (Neat):  $\lambda_{\text{max}}$  3430, 2360, 1654 ( $\text{C=O}$ ), 907, 731, 659 and 650  $\text{cm}^{-1}$ ;  $^1\text{H}$  NMR ( $\text{CDCl}_3$ )  $\delta$  7.78 (1H, s), 7.63 (1H, d,  $J = 7.6$  Hz), 7.51 (1H, d,  $J = 7.2$  Hz), 7.49-7.38 (2H, m), 7.32

(1H, t,  $J = 7.2$  Hz), 7.28 (1H, s), 5.64-5.51 (2H, m), 5.37-5.29 (1H, m), 4.86 (1H, brs), 3.09-2.89 (2H, m);  $^{13}\text{C}$  NMR ( $\text{CDCl}_3$ , DEPT-135)  $\delta$  210.2 (C,  $\text{C=O}$ ), 147.4 (C), 141.6 (C), 136.0 (C), 129.7 (CH), 129.5 (CH), 129.1 (CH), 128.2 (CH), 127.7 (CH), 127.4 (C), 127.4 (CH), 126.0 (CH), 122.4 (CH), 68.8 (CH), 53.7 ( $\text{CH}_2$ ), 51.8 ( $\text{CH}_2$ ); HRMS  $m/z$  529.1957 ( $\text{M}+\text{Na}$ ), calcd. for  $\text{C}_{29}\text{H}_{26}\text{O}_3\text{Na}$  529.1964.

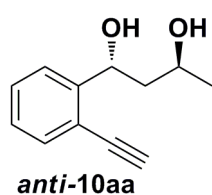

**(R,S)-1-(2-Ethynylphenyl)-butane-1,3-diol (anti-10aa):** Prepared

following Method-E, purified by column chromatography using

EtOAc/hexane and isolated as liquid.  $[\alpha]_D^{25} = +58.6^\circ$  ( $c = 0.27$  g/100

mL,  $\text{CHCl}_3$ , 93% ee); IR (Neat):  $\nu_{\text{max}}$  3293 (O-H), 3063, 2973, 2903,

2103, 1698, 1447, 1373, 1318, 1208, 1130, 1069, 932, 847 and 763  $\text{cm}^{-1}$ ;  $^1\text{H}$  NMR ( $\text{CDCl}_3$ )  $\delta$  7.57 (1H, d,  $J = 8.4$  Hz), 7.46 (1H, d,  $J = 7.2$  Hz), 7.38 (1H, t,  $J = 7.2$  Hz), 7.22 (1H, t,  $J = 7.2$  Hz)[Ar-H]; 5.38 (1H, d,  $J = 10.0$  Hz,  $\text{CHOH}$ ), 4.21-4.11 (1H, m), 3.79 (1H, br s, OH), 3.43 (1H, br s, OH), 3.32 (1H, s,  $\text{Ar-C}\equiv\text{CH}$ ), 1.92-1.85 (1H, m), 1.76-1.70 (1H, m), 1.21 (3H, d,  $J = 6.0$  Hz);  $^{13}\text{C}$  NMR ( $\text{CDCl}_3$ , DEPT-135)  $\delta$  146.8 (C), 132.7 (CH), 129.4 (CH), 127.0 (CH), 125.2 (CH), 118.9 (C), 82.2 (CH,  $\text{Ar-C}\equiv\text{CH}$ ), 81.3

(C, Ar-C≡CH), 72.7 (CH, CHOH), 69.0 (CH, CHOH), 45.9 (CH<sub>2</sub>), 23.9 (CH<sub>3</sub>); LRMS m/z 188.95 (M-1), calcd. for C<sub>12</sub>H<sub>14</sub>O<sub>2</sub> 190.0994; Anal. calcd. for C<sub>12</sub>H<sub>14</sub>O<sub>2</sub> (190.0994); C, 76.57; H, 6.43. Found: C, 75.68; H, 7.51%.

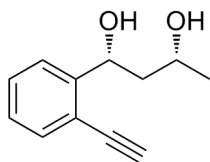

*syn*-**10aa**

**(R,R)-1-(2-Ethynylphenyl)-butane-1,3-diol (*syn*-10aa):** Prepared following Method-**F**, purified by column chromatography using EtOAc/hexane and isolated as liquid.  $[\alpha]_D^{25} = -43.2^\circ$  ( $c = 0.21$  g/100 mL, CHCl<sub>3</sub>, 95% ee); IR (Neat):  $\nu_{\max}$  3293 (O-H), 3065, 2971, 2917,

2103, 1644, 1447, 1420, 1377, 1335, 1109, 1071, 974, 937, 866, 814 and 760 cm<sup>-1</sup>; <sup>1</sup>H NMR (CDCl<sub>3</sub>)  $\delta$  7.61 (1H, d,  $J = 7.2$  Hz), 7.47 (1H, d,  $J = 7.6$  Hz), 7.39 (1H, t,  $J = 7.2$  Hz), 7.23 (1H, t,  $J = 7.2$  Hz)[Ar-*H*]; 5.52 (1H, s, CHOH), 4.07 (1H, s), 3.43 (1H, br s, OH), 3.33 (1H, s, Ar-C≡CH), 2.53 (1H, br. s, OH), 2.00–1.90 (2H, m), 1.27 (3H, d,  $J = 6.0$  Hz); <sup>13</sup>C NMR (CDCl<sub>3</sub>, DEPT-135)  $\delta$  146.8 (C), 132.9 (CH), 129.2 (CH), 126.9 (CH), 125.4 (CH), 118.9 (C), 82.4 (CH, Ar-C≡CH), 81.3 (C, Ar-C≡CH), 69.9 (CH, CHOH), 65.9 (CH, CHOH), 44.2 (CH<sub>2</sub>), 23.3 (CH<sub>3</sub>); LRMS m/z 191.15 (M+1), calcd. for C<sub>12</sub>H<sub>14</sub>O<sub>2</sub> 190.0994; Anal. calcd. for C<sub>12</sub>H<sub>14</sub>O<sub>2</sub> (190.0994); C, 76.57; H, 6.43. Found: C, 75.61; H, 7.52%.

**(1S,2S,4R)-2-((S)-(2-ethynylphenyl)(hydroxy)methyl)-4-methylcyclohexanol (10af):**

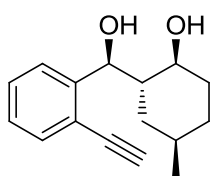

(1S, 2S, 4R, 1'S)-**10af**

Prepared following Method-**F** and purified by column chromatography using EtOAc/hexane and isolated as liquid.  $[\alpha]_D^{25} = +29.6^\circ$  ( $c = 0.071$  g/100 mL, CHCl<sub>3</sub>, 96% ee and >99% de); IR (Neat):  $\lambda_{\max}$  3300 (O-H), 2929, 1084, 756, 613, 566 and

538 cm<sup>-1</sup>; <sup>1</sup>H NMR (CDCl<sub>3</sub>)  $\delta$  7.48 (2H, d,  $J = 7.2$  Hz), 7.40 (1H, t,  $J = 7.6$  Hz), 7.24 (1H, t,  $J = 7.2$  Hz), 5.18 (1H, d,  $J = 9.2$  Hz, CHOH), 4.00–3.80 (2H, br s, OH), 3.80–3.72 (1H, m, CHOH), 3.29 (1H, s, Ar-C≡CH), 2.03–1.99 (1H, m), 1.84–1.76 (2H, m), 1.68–1.49 (3H, m), 1.25–1.15 (1H, m), 0.90–0.80 (1H, m), 0.84 (3H, d,  $J = 7.2$  Hz); <sup>13</sup>C NMR (CDCl<sub>3</sub>, DEPT-135)  $\delta$  145.0 (C), 132.8 (CH), 129.6 (CH), 127.5 (CH), 126.8 (CH), 120.8 (C), 81.9 (C, Ar-C≡CH), 81.8 (CH, Ar-C≡CH), 78.3 (CH, CHOH), 76.6 (CH, CHOH), 44.7 (CH), 32.4 (CH<sub>2</sub>), 29.7 (CH<sub>2</sub>), 29.3 (CH<sub>2</sub>), 26.4 (CH), 17.7 (CH<sub>3</sub>); LRMS m/z 245.25 (M+1), calcd. for C<sub>16</sub>H<sub>20</sub>O<sub>2</sub> 244.1463.

**(1*S*,2*S*,4*R*)-2-((*S*)-(2-ethynylphenyl)(hydroxy)methyl)-4-methylcyclohexanol (10af):**

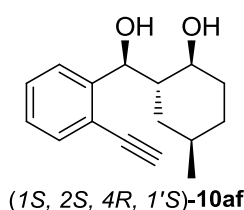

Prepared following Method-E, purified by column chromatography using EtOAc/hexane and isolated as liquid.

$[\alpha]_D^{25} = +2.2^\circ$  ( $c = 0.67$  g/100 mL, CHCl<sub>3</sub>, 96% *ee* and 90% *de*); IR (Neat):  $\lambda_{\max}$  3415 (O-H), 1395, 1324, 1135, 755, 703, 658 and 646 cm<sup>-1</sup>; <sup>1</sup>H NMR (CDCl<sub>3</sub>)  $\delta$  7.47 (1H, d,  $J = 6.8$  Hz), 7.45

(1H, d,  $J = 6.8$  Hz), 7.38 (1H, t,  $J = 7.6$  Hz), 7.22 (1H, t,  $J = 7.6$  Hz), 5.16 (1H, d,  $J = 9.2$  Hz, CHOH), 4.38 (1H, br s, OH), 4.20 (1H, br s, OH), 3.71-3.68 (1H, m, CHOH), 3.28 (1H, s, Ar-C $\equiv$ CH), 1.97-1.93 (1H, m), 1.89-1.80 (1H, m), 1.75-1.72 (1H, m), 1.58-1.46 (3H, m), 1.22-1.15 (1H, m), 0.90-0.80 (1H, m), 0.82 (3H, d,  $J = 7.2$  Hz); <sup>13</sup>C NMR (CDCl<sub>3</sub>, DEPT-135)  $\delta$  145.2 (C), 132.7 (CH), 129.6 (CH), 127.4 (CH), 126.8 (CH), 120.9 (C), 82.0 (C, Ar-C $\equiv$ CH), 81.7 (CH, Ar-C $\equiv$ CH), 78.1 (CH, CHOH), 76.5 (CH, CHOH), 44.7 (CH), 32.4 (CH<sub>2</sub>), 29.7 (CH<sub>2</sub>), 29.3 (CH<sub>2</sub>), 26.5 (CH), 17.7 (CH<sub>3</sub>); LRMS  $m/z$  245.25 (M+1), calcd. for C<sub>16</sub>H<sub>20</sub>O<sub>2</sub> 244.1463; Anal. calcd. for C<sub>16</sub>H<sub>20</sub>O<sub>2</sub> (244.1463); C, 78.65, H, 8.25; Found: C, 78.53; H, 8.16%.

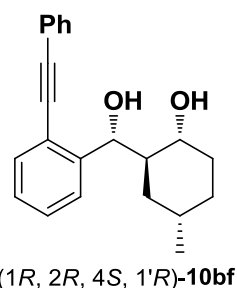

**(1*R*,2*R*,4*S*)-2-((*R*)-hydroxy(2-(phenylethynyl)phenyl)methyl)-4-methylcyclohexanol (10bf):** Prepared following Method-E,

purified by column chromatography using EtOAc/hexane and isolated as liquid.  $[\alpha]_D^{25} = -98.2^\circ$  ( $c = 0.26$  g/100 mL, CHCl<sub>3</sub>,

86% *ee* and 80% *de*); IR (Neat):  $\nu_{\max}$  3401 (O-H), 2970, 1458, 1383, 1307, 1104, 910, 881, 763, 748 and 645 cm<sup>-1</sup>; <sup>1</sup>H NMR

(CDCl<sub>3</sub>)  $\delta$  7.47-7.42 (4H, m), 7.32-7.29 (4H, m), 7.19 (1H, t,  $J = 8.0$  Hz), 5.18 (1H, d,  $J = 9.2$  Hz, CHOH), 4.60-4.00 (2H, br s, OH), 3.72-3.63 (1H, m, CHOH), 2.04-1.95 (1H, m), 1.84-1.64 (2H, m), 1.57-1.31 (3H, m), 1.20-1.06 (1H, m), 0.82-0.78 (1H, m), 0.75 (3H, d,  $J = 10.0$  Hz); <sup>13</sup>C NMR (CDCl<sub>3</sub>, DEPT-135)  $\delta$  144.5 (C), 132.1 (CH), 131.4 (2 x CH), 129.1 (CH), 128.5 (3 x CH), 127.5 (CH), 126.9 (CH), 123.1 (C), 121.9 (C), 93.9 (C), 87.6 (C), 78.6 (CH, CHOH), 76.5 (CH, CHOH), 44.8 (CH), 32.6 (CH<sub>2</sub>), 29.7 (CH<sub>2</sub>), 29.4 (CH<sub>2</sub>), 26.5 (CH), 17.8 (CH<sub>3</sub>); LRMS  $m/z$  321.25 (M+1), calcd. for

$C_{22}H_{24}O_2$  320.1776; Anal. calcd. for  $C_{22}H_{24}O_2$  (320.1776); C, 82.46, H, 7.55; Found: C, 82.15; H, 7.49%.

**(1*S*,2*S*,4*R*)-2-((*S*)-((3,5-dinitrobenzoyl)oxy)(2-ethynylphenyl)methyl)-4-**

**methylcyclohexyl 3,5-dinitrobenzoate (11af):** Prepared following Method-**G**, purified

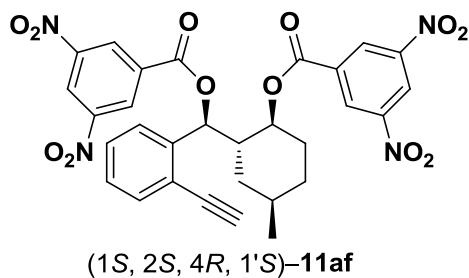

by column chromatography using EtOAc/hexane and isolated as solid.  $[\alpha]_D^{25} = +1.9^\circ$  ( $c = 0.38$  g/100 mL,  $CHCl_3$ , 96% *ee* and 90% *de*); IR (Neat):  $\lambda_{max}$  2955, 1728 (C=O), 1543 ( $NO_2$ ), 1343 ( $NO_2$ ), 1275, 1167, 730, 719 and 661  $cm^{-1}$ ;  $^1H$  NMR ( $CDCl_3$ )  $\delta$

9.28-9.27 (2H, m), 9.24-9.23 (1H, m), 9.21-9.19 (1H, m), 9.02-9.01 (2H, m), 7.59-7.57 (1H, m), 7.37-7.34 (1H, m), 7.25-7.22 (2H, m), 6.58 (1H, d,  $J = 8.8$  Hz,  $CHOBz$ ), 5.57 (1H, q,  $J = 4.4$  Hz,  $CHOBz$ ), 3.54 (1H, s, Ar- $C\equiv CH$ ), 3.08 (1H, m), 2.05-2.00 (2H, m), 1.76-1.72 (1H, m), 1.58-1.50 (1H, m), 1.48-1.42 (1H, m), 1.35-1.24 (2H, m), 0.98 (3H, d,  $J = 6.4$  Hz), 0.90-0.80 (1H, m);  $^{13}C$  NMR ( $CDCl_3$ , DEPT-135)  $\delta$  161.8 (C), 161.7 (C), 148.8 (2 x C), 148.6 (2 x C), 140.3 (C), 134.1 (C), 134.0 (CH), 133.5 (C), 129.7 (2 x CH), 129.3 (3 x CH), 128.4 (CH), 126.4 (CH), 122.6 (CH), 122.4 (CH), 121.2 (C), 83.1 (CH, Ar- $C\equiv CH$ ), 81.3 (C, Ar- $C\equiv CH$ ), 77.3 (CH), 73.7 (CH), 42.0 (CH), 32.4 ( $CH_2$ ), 29.2 ( $CH_2$ ), 27.0 (CH), 26.4 ( $CH_2$ ), 20.8 ( $CH_3$ ); LRMS  $m/z$  632.55 ( $M+1$ ), calcd. for  $C_{30}H_{24}N_4O_{12}$  632.1391; Anal. calcd. for  $C_{30}H_{24}N_4O_{12}$  (632.1391); C, 56.96, H, 3.82, N, 8.86; Found: C, 56.85; H, 3.76; N, 8.45%.



## Datablock: (*R,R*)-(+)-6aa

Bond precision: C-C = 0.0037 Å Wavelength=0.71073

Cell: a=5.7710(11) b=10.930(2) c=28.102(6)

alpha=90 beta=90 gamma=90

Temperature: 273 K

|                        | Calculated   | Reported          |
|------------------------|--------------|-------------------|
| Volume                 | 1772.6(6)    | 1772.7(6)         |
| Space group            | P 21 21 21   | P212121           |
| Hall group             | P 2ac 2ab    | ?                 |
| Moiety formula         | C21 H18 O3   | ?                 |
| Sum formula            | C21 H18 O3   | C1.62 H1.38 O0.23 |
| Mr                     | 318.35       | 24.49             |
| Dx, g cm <sup>-3</sup> | 1.193        | 1.193             |
| Z                      | 4            | 52                |
| Mu (mm <sup>-1</sup> ) | 0.079        | 0.079             |
| F000                   | 672.0        | 672.0             |
| F000'                  | 672.33       |                   |
| h, k, lmax             | 7, 13, 34    | 7, 13, 34         |
| Nref                   | 2056[ 3501]  | 3480              |
| Tmin, Tmax             | 0.970, 0.978 | 0.971, 0.978      |
| Tmin'                  | 0.970        |                   |

Correction method= MULTI-SCAN

Data completeness= 1.69/0.99 Theta(max)= 26.050

R(reflections)= 0.0556( 2978) wR2(reflections)= 0.1295( 3480)

S = 1.116 Npar= 223

## Datablock (*R,R*)-(+)-6aa - ellipsoid plot

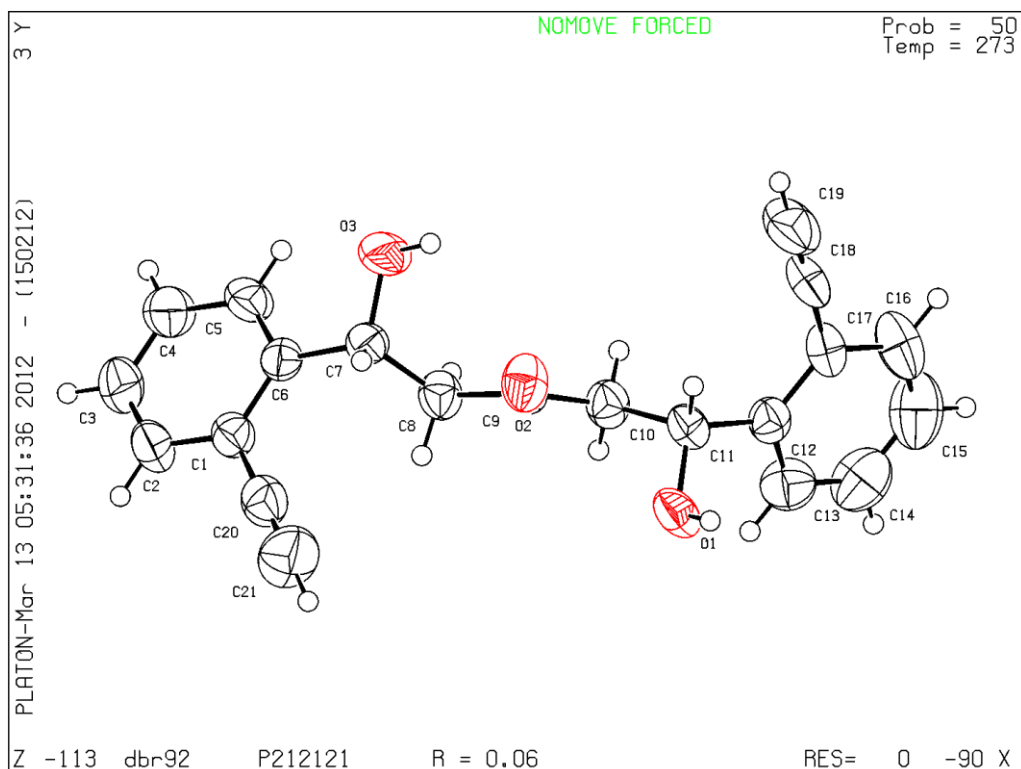

Supplement: c2ob25563d.pdf [file c2ob25563d.pdf]
